# Supplementary material
Source: PubMed Central journal article supplement (PMC4772747)
Supplement: NIHMS760895-supplement-Supplement.pdf [file NIHMS760895-supplement-Supplement.pdf]

**Supporting Information for:**

**Revised Parameters for the AMOEBA Polarizable  
Atomic Multipole Water Model**

Marie L. Laury,<sup>§,\*</sup> Lee-Ping Wang,<sup>‡,\*</sup> Vijay S. Pande,<sup>‡</sup>  
Teresa Head-Gordon<sup>¶</sup> and Jay W. Ponder<sup>§</sup>

<sup>§</sup>*Department of Chemistry, Washington University in St. Louis, St. Louis, MO 63105*

<sup>‡</sup>*Department of Chemistry, Stanford University, Stanford, CA 94305*

<sup>¶</sup>*Department of Chemistry, University of California, Berkeley, CA 94720*

\*These authors contributed equally to this work.

Corresponding Author:  
Jay W. Ponder  
Department of Chemistry  
Washington University in Saint Louis  
Saint Louis, MO 63105  
(314) 935-4275  
ponder@dasher.wustl.edu

**Table S1.** Density determined using the AMOEBA14 and AMOEBA03 models for temperatures ranging from 249.15 Kelvin to 373.15 Kelvin at 1 atm. Units are kg/m<sup>3</sup>.

| <b>Temp</b> | <b>Expt.</b> | <b>AMOEBA 14</b> | <b>AMOEBA03</b> |
|-------------|--------------|------------------|-----------------|
| 249.15      | 990.5        | 989.5 ± 1.1      | 960.5 ± 3.6     |
| 253.15      | 993.5        | 993.2 ± 0.9      | 973.1 ± 2.0     |
| 257.15      | 995.8        | 996.5 ± 0.7      | 980.5 ± 1.1     |
| 261.15      | 997.5        | 998.6 ± 0.5      | 986.2 ± 0.8     |
| 265.15      | 998.6        | 999.9 ± 0.5      | 991.0 ± 0.6     |
| 269.15      | 999.4        | 1000.7 ± 0.4     | 995.0 ± 0.5     |
| 273.15      | 999.8        | 1001.3 ± 0.4     | 998.0 ± 0.4     |
| 277.15      | 1000.0       | 1001.5 ± 0.3     | 1000.0 ± 0.4    |
| 281.15      | 999.8        | 1001.3 ± 0.3     | 1001.0 ± 0.3    |
| 285.15      | 999.5        | 1000.8 ± 0.3     | 1001.5 ± 0.3    |
| 289.15      | 998.9        | 1000.1 ± 0.3     | 1001.6 ± 0.3    |
| 293.15      | 998.2        | 999.1 ± 0.2      | 1001.3 ± 0.2    |
| 298.15      | 997.0        | 997.9 ± 0.2      | 1000.7 ± 0.2    |
| 301.15      | 996.2        | 997.1 ± 0.2      | 1000.1 ± 0.2    |
| 305.15      | 995.0        | 996.0 ± 0.2      | 999.1 ± 0.2     |
| 309.15      | 993.7        | 994.7 ± 0.2      | 997.8 ± 0.2     |
| 313.15      | 992.2        | 993.3 ± 0.2      | 996.2 ± 0.2     |
| 317.15      | 990.6        | 991.7 ± 0.2      | 994.3 ± 0.2     |
| 321.15      | 988.9        | 989.9 ± 0.2      | 992.2 ± 0.2     |
| 325.15      | 987.1        | 987.9 ± 0.2      | 990.0 ± 0.2     |
| 329.15      | 985.2        | 985.7 ± 0.2      | 987.7 ± 0.2     |
| 333.15      | 983.2        | 983.4 ± 0.2      | 985.3 ± 0.2     |
| 337.15      | 981.1        | 981.1 ± 0.2      | 982.7 ± 0.2     |
| 341.15      | 978.9        | 978.6 ± 0.2      | 979.9 ± 0.2     |
| 345.15      | 976.6        | 975.9 ± 0.2      | 976.9 ± 0.2     |
| 349.15      | 974.2        | 973.1 ± 0.2      | 973.9 ± 0.2     |
| 353.15      | 971.8        | 970.3 ± 0.2      | 970.8 ± 0.2     |
| 357.15      | 969.3        | 967.4 ± 0.2      | 967.6 ± 0.2     |
| 361.15      | 966.7        | 964.3 ± 0.2      | 964.1 ± 0.2     |
| 365.15      | 964.0        | 961.2 ± 0.2      | 960.5 ± 0.2     |
| 369.15      | 961.2        | 958.0 ± 0.2      | 956.7 ± 0.2     |
| 373.15      | 958.4        | 954.8 ± 0.2      | 952.8 ± 0.3     |

**Table S2.** Enthalpy of vaporization determined using the AMOEBA14 and AMOEBA03 models for temperatures ranging from 249.15 Kelvin to 373.15 Kelvin at 1 atm. Units are kcal/mol.

| <b>Temp.</b> | <b>Expt.</b> | <b>AMOEBA14</b> | <b>AMOEBA03</b> |
|--------------|--------------|-----------------|-----------------|
| 249.15       | 46.103       | 47.239 ± 0.065  | 47.095 ± 0.094  |
| 253.15       | 45.919       | 46.974 ± 0.055  | 46.632 ± 0.056  |
| 257.15       | 45.740       | 46.716 ± 0.048  | 46.282 ± 0.039  |
| 261.15       | 45.565       | 46.473 ± 0.046  | 45.967 ± 0.036  |
| 265.15       | 45.393       | 46.246 ± 0.046  | 45.668 ± 0.035  |
| 269.15       | 45.223       | 46.024 ± 0.046  | 45.369 ± 0.034  |
| 273.15       | 45.053       | 45.809 ± 0.046  | 45.081 ± 0.035  |
| 277.15       | 44.884       | 45.598 ± 0.045  | 44.805 ± 0.035  |
| 281.15       | 44.714       | 45.389 ± 0.045  | 44.541 ± 0.034  |
| 285.15       | 44.544       | 45.175 ± 0.045  | 44.288 ± 0.034  |
| 289.15       | 44.374       | 44.958 ± 0.044  | 44.043 ± 0.033  |
| 293.15       | 44.203       | 44.741 ± 0.044  | 43.802 ± 0.032  |
| 298.15       | 43.989       | 44.475 ± 0.044  | 43.502 ± 0.032  |
| 301.15       | 43.861       | 44.316 ± 0.045  | 43.320 ± 0.032  |
| 305.15       | 43.689       | 44.106 ± 0.046  | 43.078 ± 0.033  |
| 309.15       | 43.517       | 43.904 ± 0.047  | 42.840 ± 0.033  |
| 313.15       | 43.345       | 43.709 ± 0.047  | 42.607 ± 0.034  |
| 317.15       | 43.172       | 43.511 ± 0.047  | 42.375 ± 0.035  |
| 321.15       | 42.999       | 43.305 ± 0.047  | 42.142 ± 0.035  |
| 325.15       | 42.826       | 43.097 ± 0.048  | 41.910 ± 0.035  |
| 329.15       | 42.652       | 42.894 ± 0.048  | 41.678 ± 0.035  |
| 333.15       | 42.476       | 42.692 ± 0.048  | 41.450 ± 0.035  |
| 337.15       | 42.300       | 42.486 ± 0.048  | 41.228 ± 0.035  |
| 341.15       | 42.123       | 42.272 ± 0.048  | 41.005 ± 0.035  |
| 345.15       | 41.943       | 42.055 ± 0.049  | 40.781 ± 0.035  |
| 349.15       | 41.762       | 41.841 ± 0.049  | 40.559 ± 0.036  |
| 353.15       | 41.580       | 41.632 ± 0.050  | 40.337 ± 0.036  |
| 357.15       | 41.396       | 41.430 ± 0.051  | 40.113 ± 0.037  |
| 361.15       | 41.210       | 41.227 ± 0.053  | 39.881 ± 0.039  |
| 365.15       | 41.024       | 41.019 ± 0.058  | 39.648 ± 0.042  |
| 369.15       | 40.837       | 40.806 ± 0.067  | 39.415 ± 0.047  |
| 373.15       | 40.652       | 40.591 ± 0.077  | 39.181 ± 0.055  |

**Table S3.** Thermal expansion coefficient determined using the AMOEBA14 and AMOEBA03 models for temperatures ranging from 249.15 K to 373.15 K at 1 atm. Units are  $10^{-4} \text{ K}^{-1}$ .

| <b>Temp.</b> | <b>Expt.</b> | <b>AMOEBA14</b> | <b>AMOEBA03</b>  |
|--------------|--------------|-----------------|------------------|
| 249.15       | -8.877       | -9.152 ± 2.488  | -46.628 ± 12.614 |
| 253.15       | -6.606       | -9.097 ± 2.017  | -23.434 ± 6.649  |
| 257.15       | -4.874       | -6.872 ± 1.528  | -16.216 ± 3.260  |
| 261.15       | -3.506       | -4.099 ± 1.189  | -13.155 ± 2.044  |
| 265.15       | -2.395       | -2.520 ± 1.024  | -11.041 ± 1.623  |
| 269.15       | -1.469       | -1.784 ± 0.900  | -9.027 ± 1.303   |
| 273.15       | -0.680       | -0.967 ± 0.779  | -6.348 ± 1.035   |
| 277.15       | 0.003        | -0.053 ± 0.691  | -3.636 ± 0.845   |
| 281.15       | 0.604        | 0.795 ± 0.630   | -1.726 ± 0.720   |
| 285.15       | 1.141        | 1.633 ± 0.564   | -0.655 ± 0.628   |
| 289.15       | 1.626        | 2.265 ± 0.498   | 0.134 ± 0.549    |
| 293.15       | 2.068        | 2.445 ± 0.457   | 0.904 ± 0.482    |
| 298.15       | 2.572        | 2.416 ± 0.428   | 1.726 ± 0.415    |
| 301.15       | 2.853        | 2.582 ± 0.411   | 2.183 ± 0.387    |
| 305.15       | 3.206        | 3.051 ± 0.389   | 2.874 ± 0.370    |
| 309.15       | 3.539        | 3.513 ± 0.372   | 3.653 ± 0.370    |
| 313.15       | 3.853        | 3.836 ± 0.362   | 4.388 ± 0.367    |
| 317.15       | 4.152        | 4.236 ± 0.353   | 4.989 ± 0.353    |
| 321.15       | 4.438        | 4.828 ± 0.343   | 5.427 ± 0.338    |
| 325.15       | 4.712        | 5.359 ± 0.333   | 5.703 ± 0.327    |
| 329.15       | 4.975        | 5.647 ± 0.325   | 5.974 ± 0.318    |
| 333.15       | 5.231        | 5.866 ± 0.318   | 6.411 ± 0.307    |
| 337.15       | 5.478        | 6.207 ± 0.313   | 6.941 ± 0.298    |
| 341.15       | 5.719        | 6.630 ± 0.310   | 7.367 ± 0.293    |
| 345.15       | 5.954        | 6.987 ± 0.310   | 7.616 ± 0.293    |
| 349.15       | 6.185        | 7.215 ± 0.312   | 7.830 ± 0.294    |
| 353.15       | 6.411        | 7.412 ± 0.316   | 8.187 ± 0.296    |
| 357.15       | 6.633        | 7.704 ± 0.321   | 8.680 ± 0.299    |
| 361.15       | 6.853        | 8.056 ± 0.332   | 9.199 ± 0.309    |
| 365.15       | 7.071        | 8.317 ± 0.356   | 9.688 ± 0.330    |
| 369.15       | 7.287        | 8.407 ± 0.398   | 10.105 ± 0.367   |
| 373.15       | 7.501        | 8.369 ± 0.454   | 10.437 ± 0.418   |

**Table S4.** Isothermal compressibility determined using the AMOEBA14 and AMOEBA03 models for temperatures ranging from 249.15 K to 373.15 K at 1 atm. Units are  $10^{-6} \text{ bar}^{-1}$ .

| <b>Temp</b> | <b>Expt.</b> | <b>AMOEBA14</b> | <b>AMOEBA03</b>  |
|-------------|--------------|-----------------|------------------|
| 249.15      | 67.985       | 65.373 ± 5.070  | 160.222 ± 27.616 |
| 253.15      | 63.996       | 65.066 ± 4.149  | 118.122 ± 14.617 |
| 257.15      | 60.783       | 61.819 ± 3.127  | 104.895 ± 7.348  |
| 261.15      | 58.116       | 58.027 ± 2.351  | 98.056 ± 4.755   |
| 265.15      | 55.851       | 55.527 ± 1.980  | 91.552 ± 3.731   |
| 269.15      | 53.893       | 53.806 ± 1.755  | 86.138 ± 2.952   |
| 273.15      | 52.176       | 52.072 ± 1.527  | 81.446 ± 2.363   |
| 277.15      | 50.653       | 50.469 ± 1.348  | 77.030 ± 1.940   |
| 281.15      | 49.288       | 49.163 ± 1.235  | 73.512 ± 1.655   |
| 285.15      | 48.056       | 48.108 ± 1.115  | 71.061 ± 1.465   |
| 289.15      | 46.934       | 47.417 ± 0.988  | 69.278 ± 1.292   |
| 293.15      | 45.892       | 47.049 ± 0.910  | 67.803 ± 1.130   |
| 298.15      | 45.247       | 46.577 ± 0.872  | 66.105 ± 0.965   |
| 301.15      | 44.943       | 46.171 ± 0.845  | 65.162 ± 0.904   |
| 305.15      | 44.622       | 45.639 ± 0.791  | 64.136 ± 0.879   |
| 309.15      | 44.390       | 45.260 ± 0.742  | 63.491 ± 0.888   |
| 313.15      | 44.239       | 44.988 ± 0.712  | 63.150 ± 0.879   |
| 317.15      | 44.162       | 44.877 ± 0.695  | 62.923 ± 0.839   |
| 321.15      | 44.153       | 45.046 ± 0.675  | 62.697 ± 0.796   |
| 325.15      | 44.209       | 45.339 ± 0.651  | 62.532 ± 0.772   |
| 329.15      | 44.324       | 45.551 ± 0.636  | 62.612 ± 0.766   |
| 333.15      | 44.496       | 45.747 ± 0.634  | 63.003 ± 0.763   |
| 337.15      | 44.723       | 46.060 ± 0.644  | 63.546 ± 0.759   |
| 341.15      | 45.003       | 46.501 ± 0.658  | 63.980 ± 0.755   |
| 345.15      | 45.333       | 47.018 ± 0.666  | 64.160 ± 0.751   |
| 349.15      | 45.714       | 47.632 ± 0.667  | 64.226 ± 0.743   |
| 353.15      | 46.143       | 48.421 ± 0.668  | 64.509 ± 0.736   |
| 357.15      | 46.621       | 49.337 ± 0.674  | 65.251 ± 0.744   |
| 361.15      | 47.148       | 50.194 ± 0.698  | 66.518 ± 0.787   |
| 365.15      | 47.722       | 50.889 ± 0.752  | 68.277 ± 0.873   |
| 369.15      | 48.346       | 51.520 ± 0.839  | 70.342 ± 0.999   |
| 373.15      | 49.019       | 52.246 ± 0.952  | 72.489 ± 1.162   |

**Table S5.** Isobaric heat capacity determined using the AMOEBA14 and AMOEBA03 models for temperatures ranging from 249.15 K to 373.15 K at 1 atm. Units are cal mol<sup>-1</sup> K<sup>-1</sup>.

| <b>Temp.</b> | <b>Expt.</b> | <b>AMOEBA14</b> | <b>AMOEBA03</b> |
|--------------|--------------|-----------------|-----------------|
| 249.15       | 19.177       | 23.689 ± 2.010  | 42.263 ± 8.351  |
| 253.15       | 18.777       | 23.745 ± 1.658  | 30.878 ± 4.336  |
| 257.15       | 18.532       | 23.081 ± 1.252  | 27.610 ± 2.023  |
| 261.15       | 18.380       | 22.014 ± 0.953  | 26.255 ± 1.231  |
| 265.15       | 18.280       | 21.341 ± 0.822  | 25.821 ± 1.032  |
| 269.15       | 18.210       | 20.992 ± 0.748  | 25.589 ± 0.845  |
| 273.15       | 18.157       | 20.658 ± 0.691  | 24.812 ± 0.649  |
| 277.15       | 18.115       | 20.454 ± 0.649  | 24.114 ± 0.531  |
| 281.15       | 18.080       | 20.519 ± 0.611  | 23.431 ± 0.474  |
| 285.15       | 18.052       | 20.770 ± 0.576  | 22.755 ± 0.445  |
| 289.15       | 18.030       | 20.925 ± 0.548  | 22.386 ± 0.425  |
| 293.15       | 18.015       | 20.732 ± 0.525  | 22.252 ± 0.406  |
| 298.15       | 18.002       | 20.482 ± 0.498  | 22.359 ± 0.389  |
| 301.15       | 17.998       | 20.425 ± 0.482  | 22.405 ± 0.382  |
| 305.15       | 17.995       | 20.087 ± 0.465  | 22.182 ± 0.376  |
| 309.15       | 17.995       | 19.513 ± 0.460  | 21.855 ± 0.373  |
| 313.15       | 17.996       | 19.334 ± 0.458  | 21.691 ± 0.368  |
| 317.15       | 17.999       | 19.713 ± 0.454  | 21.591 ± 0.358  |
| 321.15       | 18.002       | 20.039 ± 0.448  | 21.595 ± 0.345  |
| 325.15       | 18.006       | 19.857 ± 0.441  | 21.616 ± 0.333  |
| 329.15       | 18.011       | 19.509 ± 0.433  | 21.369 ± 0.325  |
| 333.15       | 18.018       | 19.535 ± 0.422  | 20.985 ± 0.320  |
| 337.15       | 18.026       | 19.930 ± 0.409  | 20.824 ± 0.318  |
| 341.15       | 18.035       | 20.237 ± 0.399  | 20.840 ± 0.318  |
| 345.15       | 18.046       | 20.178 ± 0.396  | 20.760 ± 0.320  |
| 349.15       | 18.058       | 19.811 ± 0.398  | 20.611 ± 0.321  |
| 353.15       | 18.071       | 19.339 ± 0.402  | 20.647 ± 0.319  |
| 357.15       | 18.086       | 19.060 ± 0.407  | 20.886 ± 0.318  |
| 361.15       | 18.101       | 19.141 ± 0.419  | 21.060 ± 0.325  |
| 365.15       | 18.117       | 19.397 ± 0.446  | 21.024 ± 0.350  |
| 369.15       | 18.134       | 19.547 ± 0.493  | 20.928 ± 0.396  |
| 373.15       | 18.151       | 19.505 ± 0.558  | 21.075 ± 0.461  |

**Table S6.** Dielectric constant determined using the AMOEBA14 and AMOEBA03 models for temperatures ranging from 249.15 K to 373.15 K at 1 atm.

| <b>Temp.</b> | <b>Expt.</b> | <b>AMOEBA14</b> | <b>AMOEBA03</b>  |
|--------------|--------------|-----------------|------------------|
| 249.15       | 98.650       | 97.737 ± 7.876  | 121.234 ± 11.002 |
| 253.15       | 96.580       | 95.578 ± 5.816  | 115.714 ± 7.315  |
| 257.15       | 94.683       | 94.541 ± 4.643  | 111.897 ± 5.229  |
| 261.15       | 92.898       | 93.602 ± 4.124  | 110.050 ± 4.030  |
| 265.15       | 91.186       | 92.808 ± 3.694  | 109.014 ± 3.364  |
| 269.15       | 89.525       | 92.249 ± 3.398  | 107.758 ± 2.991  |
| 273.15       | 87.903       | 91.219 ± 3.202  | 106.083 ± 2.748  |
| 277.15       | 86.311       | 89.491 ± 2.921  | 103.973 ± 2.501  |
| 281.15       | 84.749       | 87.585 ± 2.571  | 101.347 ± 2.225  |
| 285.15       | 83.213       | 85.704 ± 2.254  | 98.525 ± 1.998   |
| 289.15       | 81.705       | 83.697 ± 1.996  | 95.856 ± 1.808   |
| 293.15       | 80.223       | 81.622 ± 1.785  | 93.335 ± 1.605   |
| 298.15       | 78.409       | 79.396 ± 1.597  | 90.395 ± 1.379   |
| 301.15       | 77.339       | 78.390 ± 1.529  | 88.835 ± 1.288   |
| 305.15       | 75.935       | 77.276 ± 1.473  | 86.965 ± 1.204   |
| 309.15       | 74.556       | 76.081 ± 1.416  | 85.206 ± 1.135   |
| 313.15       | 73.200       | 74.611 ± 1.332  | 83.368 ± 1.067   |
| 317.15       | 71.869       | 72.889 ± 1.225  | 81.256 ± 0.992   |
| 321.15       | 70.560       | 70.958 ± 1.114  | 78.936 ± 0.901   |
| 325.15       | 69.275       | 68.958 ± 1.017  | 76.686 ± 0.808   |
| 329.15       | 68.012       | 67.152 ± 0.941  | 74.669 ± 0.737   |
| 333.15       | 66.772       | 65.670 ± 0.880  | 72.815 ± 0.690   |
| 337.15       | 65.555       | 64.407 ± 0.827  | 70.990 ± 0.653   |
| 341.15       | 64.359       | 63.233 ± 0.780  | 69.187 ± 0.616   |
| 345.15       | 63.184       | 62.104 ± 0.739  | 67.522 ± 0.578   |
| 349.15       | 62.030       | 60.962 ± 0.702  | 66.075 ± 0.541   |
| 353.15       | 60.897       | 59.704 ± 0.665  | 64.771 ± 0.505   |
| 357.15       | 59.784       | 58.286 ± 0.632  | 63.442 ± 0.473   |
| 361.15       | 58.691       | 56.811 ± 0.610  | 61.976 ± 0.454   |
| 365.15       | 57.617       | 55.435 ± 0.618  | 60.418 ± 0.462   |
| 369.15       | 56.561       | 54.223 ± 0.665  | 58.913 ± 0.502   |
| 373.15       | 55.522       | 53.142 ± 0.746  | 57.562 ± 0.568   |

**Table S7.** Second virial coefficient of water. AMOEBA14 and AMOEBA03 results are shown for the classical value,  $B_{cl}(T)$ , as well as the translational and rotational quantum corrections,  $\Delta B_{trans}$  and  $\Delta B_{rot}$ . The overall value,  $B(T)$ , is the sum of the three terms.

| Temp.<br>(K) | Expt.  | AMOEBA03    |                    |                  |         | AMOEBA14    |                    |                  |         |
|--------------|--------|-------------|--------------------|------------------|---------|-------------|--------------------|------------------|---------|
|              |        | $B_{cl}(T)$ | $\Delta B_{trans}$ | $\Delta B_{rot}$ | $B(T)$  | $B_{cl}(T)$ | $\Delta B_{trans}$ | $\Delta B_{rot}$ | $B(T)$  |
| <b>298</b>   | -1.158 | -1.2013     | 0.0301             | 0.3738           | -0.7974 | -1.0689     | 0.0245             | 0.3089           | -0.7356 |
| <b>310</b>   | -0.966 | -0.9866     | 0.0224             | 0.2755           | -0.6888 | -0.8941     | 0.0185             | 0.2371           | -0.6385 |
| <b>323</b>   | -0.816 | -0.7982     | 0.0160             | 0.2016           | -0.5806 | -0.7323     | 0.0137             | 0.1723           | -0.5462 |
| <b>336</b>   | -0.696 | -0.6679     | 0.0120             | 0.1533           | -0.5025 | -0.6142     | 0.0103             | 0.1318           | -0.4721 |
| <b>360</b>   | -0.526 | -0.6615     | 0.0121             | 0.1507           | -0.4988 | -0.4533     | 0.0065             | 0.0837           | -0.3631 |
| <b>380</b>   | -0.428 | -0.3876     | 0.0053             | 0.0656           | -0.3167 | -0.3653     | 0.0046             | 0.0594           | -0.3013 |
| <b>400</b>   | -0.356 | -0.3198     | 0.0039             | 0.0478           | -0.2681 | -0.2991     | 0.0034             | 0.0437           | -0.2520 |
| <b>423</b>   | -0.275 | -0.2573     | 0.0028             | 0.0345           | -0.2200 | -0.2479     | 0.0025             | 0.0319           | -0.2135 |
| <b>448</b>   | -0.240 | -0.2128     | 0.0020             | 0.0250           | -0.1857 | -0.2014     | 0.0018             | 0.0232           | -0.1764 |
| <b>473</b>   | -0.201 | -0.1755     | 0.0015             | 0.0188           | -0.1552 | -0.1688     | 0.0014             | 0.0178           | -0.1496 |
| <b>523</b>   | -0.150 | -0.1255     | 0.0009             | 0.0113           | -0.1133 | -0.1210     | 0.0009             | 0.0108           | -0.1093 |
| <b>573</b>   | -0.116 | -0.0932     | 0.0006             | 0.0074           | -0.0852 | -0.0907     | 0.0006             | 0.0072           | -0.0829 |
| <b>673</b>   | -0.074 | -0.0559     | 0.0003             | 0.0037           | -0.0518 | -0.0543     | 0.0003             | 0.0037           | -0.0504 |
| <b>773</b>   | -0.050 | -0.0351     | 0.0002             | 0.0022           | -0.0327 | -0.0341     | 0.0002             | 0.0022           | -0.0317 |



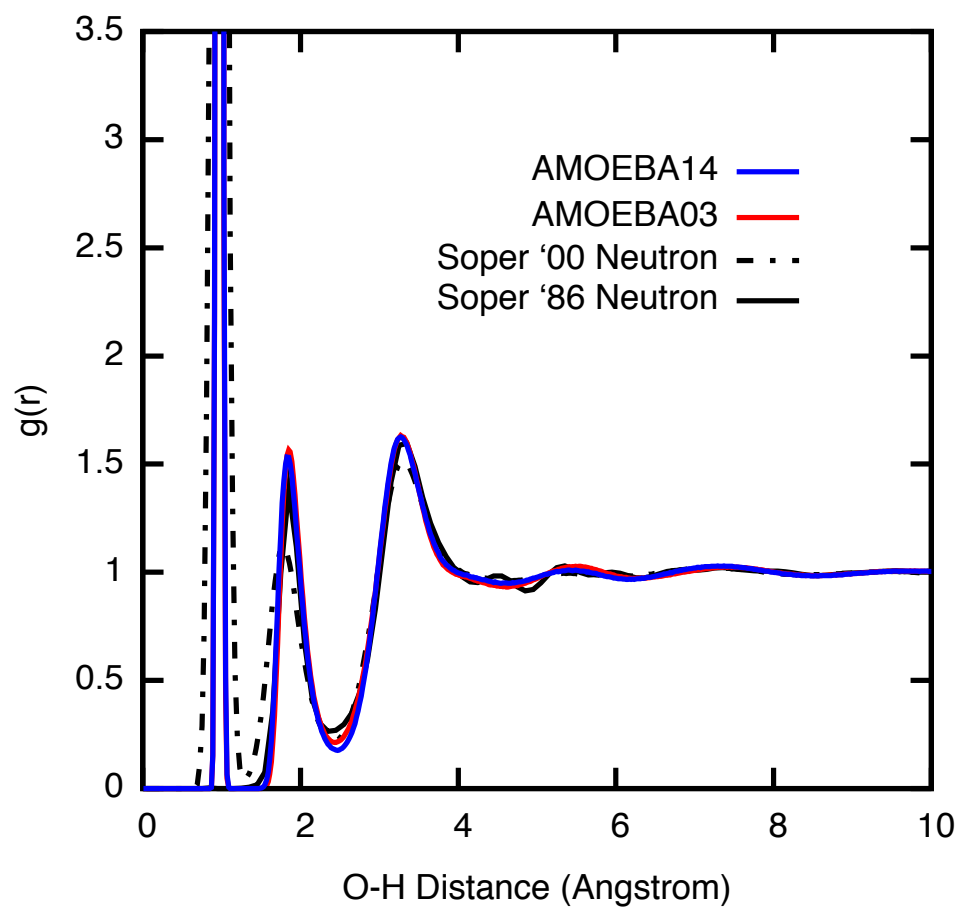

**Figure S1.** The water O-H radial distribution functions at 298K for AMOEBA03, AMOEBA14 and iAMOEBA compared against experimental values.

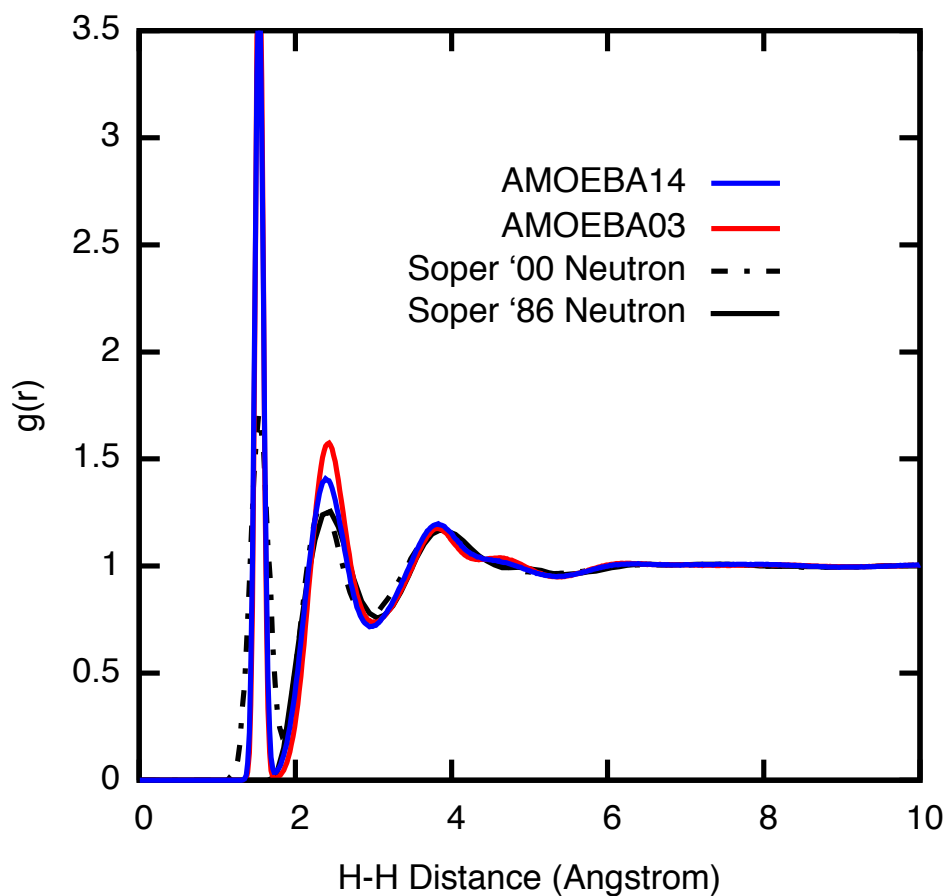

**Figure S2.** The water H-H radial distribution functions at 298K for AMOEBA03, AMOEBA14 and iAMOEBA compared against experimental values.
